# Supplementary material
Source: HighWire-hosted journal article supplement (https://erj.ersjournals.com/content/54/3/1901503)
Supplement: inline-supplementary-material-1 [file inline-supplementary-material-1.pdf]

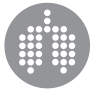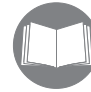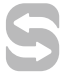

SHAREABLE PDF

# The ERS fellowship portfolio: fostering excellence and diversity

Rory E. Morty<sup>1</sup>, Louise E. Donnelly<sup>2</sup>, Daiana Stolz<sup>3</sup>, Nicolas Roche<sup>4</sup>, Tobias Welte<sup>5</sup>, Kathryn A. Forrest<sup>6</sup>, Christopher E. Brightling<sup>7</sup> and Guy G. Brusselle<sup>8,9</sup>

**Affiliations:** <sup>1</sup>Dept of Lung Development and Remodelling, Max Planck Institute for Heart and Lung Research, Bad Nauheim, Germany. <sup>2</sup>Faculty of Medicine, National Heart and Lung Institute, Imperial College London, London, UK. <sup>3</sup>Pulmonary Care Division, Internal Medicine, University Hospital Basel, Basel, Switzerland. <sup>4</sup>Hopital Cochin, University Paris Descartes, Paris, France. <sup>5</sup>Respiratory Medicine, Medical School Hannover, Hannover, Germany. <sup>6</sup>Scientific Activities Dept, European Respiratory Society, Lausanne, Switzerland. <sup>7</sup>Leicester NIHR Biomedical Research Centre, University of Leicester, Leicester, UK. <sup>8</sup>Depts of Epidemiology and Respiratory Medicine, Erasmus Medical Center, Rotterdam, The Netherlands. <sup>9</sup>Dept of Respiratory Medicine, Ghent University Hospital, Ghent, Belgium.

**Correspondence:** Rory E. Morty, Dept of Lung Development and Remodelling, Max Planck Institute for Heart and Lung Research, Parkstr. 1, 61231 Bad Nauheim, Germany. E-mail: rory.morty@mpi-bn.mpg.de

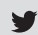

@ERSpublications

**The ERS fellowship portfolio continues to be refined, to respond to the changing needs of our Society. Under the 2016–2019 Fellowship strategy, a wide range of programmes is available, reflecting the diversity and global dimension of the ERS membership.** <http://bit.ly/2YEpOnv>

**Cite this article as:** Morty RE, Donnelly LE, Stolz D, *et al.* The ERS fellowship portfolio: fostering excellence and diversity. *Eur Respir J* 2019; 54: 1901503 [<https://doi.org/10.1183/13993003.01503-2019>].

This single-page version can be shared freely online.

The European Respiratory Society (ERS) has offered fellowships since 1997, and to date, more than 770 researchers have been recipients of ERS fellowships. Under the remit of the 2016–2019 ERS Fellowships and Awards Director, Rory E. Morty, the fellowship portfolio has been further developed and consolidated in order to meet the diverse needs of an increasingly global ERS membership and to help address unmet needs in respiratory research, in line with the Society's mission to promote lung health and to actively involve ERS members in the earlier phases of their career.
